# Supplementary material
Source: publisher figshare collection journal article supplement (https://future-science-group.figshare.com/ndownloader/files/28924815)
Supplement: Supplementary file 1 [file 28924815]

**Supplemental Table 1**

| **Metal oxide NP** | **RLU/well** | **RLU/well** | **RLU/well** | **RLU/well** | **RLU/well** |
| --- | --- | --- | --- | --- | --- |
| **None control** | **Background** | **Background** | **Background** | **Background** | **Background** |
| **Zinc** | **103** | **103** | **103** | **103** | **103** |
| **Cobalt** | **1 x 105** | **4x105** | **4x105** | **6x105** | **4x105** |
| **Magnesium** | **102** | **102** | **102** | **102** | **102** |
| **Nickel** | **nt** | **nt** | **nt** | **nt** | **nt** |
| **Iron** | **< 102** | **< 102** | **< 102** | **< 102** | **< 102** |

**Supplemental Table 1.** Functional delivery of splice shifting oligomer by nanoparticle type in the system described by Dean and Delong [1].

1. Dean JM, DeLong RK. A high-throughput screening assay for the functional delivery of splice-switching oligonucleotides in human melanoma cells. *Methods Mol. Biol.* 1297, 187-196 (2015).
